# Supplementary material
Source: ML conference proceedings conference paper supplement (https://openreview.net/forum?id=jC9G3ns6jH)

# Interval Length

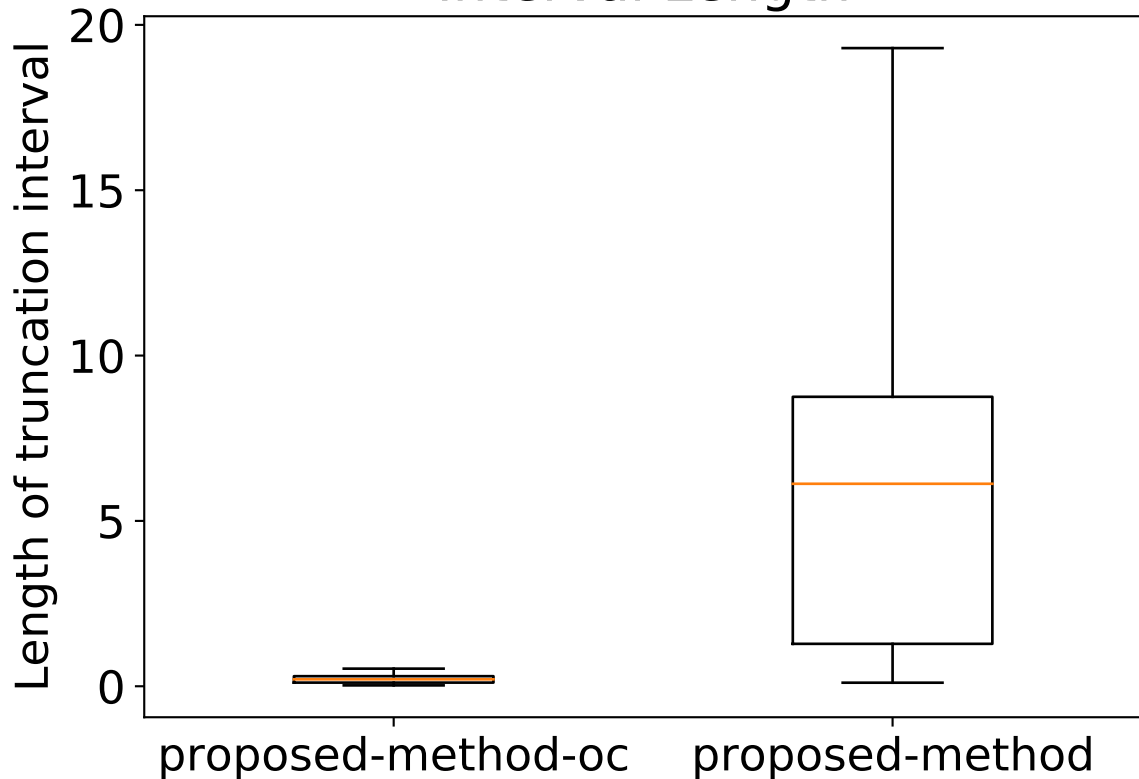

Supplement: supplementary_material [file attachment]

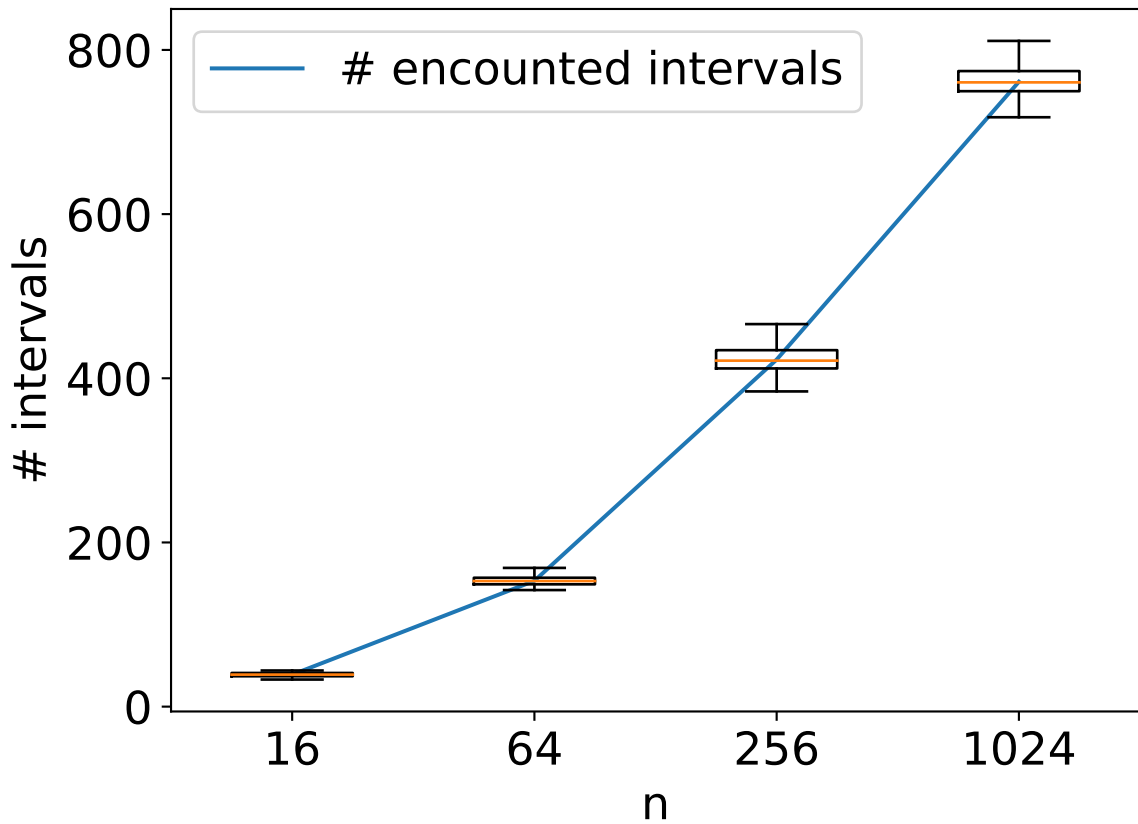

Supplement: supplementary_material [file attachment]

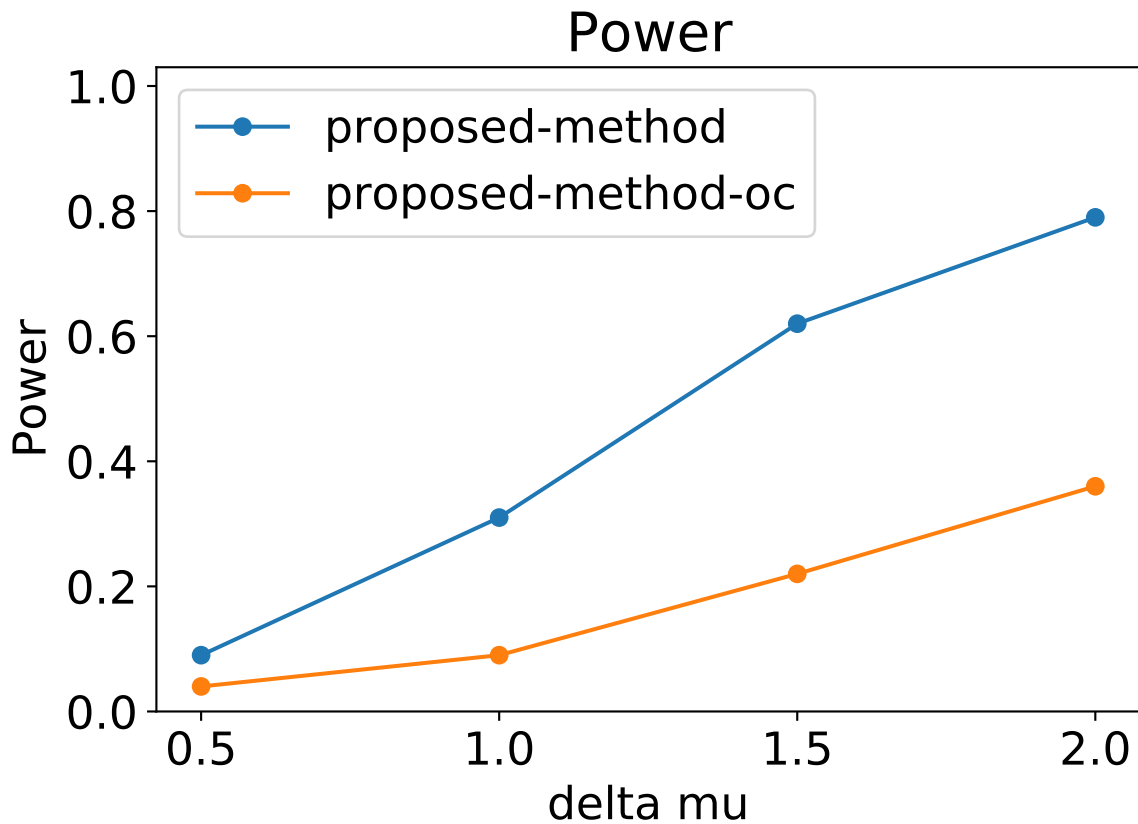

Supplement: supplementary_material [file attachment]
